# Supplementary material
Source: PubMed Central journal article supplement (PMC11029168)
Supplement: 262_2014_1578_MOESM1_ESM.pdf [file 262_2014_1578_MOESM1_ESM.pdf]

**SUPPLEMENTARY INFORMATION:**

**CANCER IMMUNOLOGY, IMMUNOTHERAPY (SUBMITTED IN 2014) - ØYSTEIN BRUSERUD ET AL.**

**COMPARISON OF ECP TO OTHER TREATMENT OPTIONS - A DETAILED DISCUSSION OF THE CURRENT RECOMMENDATIONS FOR USE OF ECP IN THE TREATMENT OF GVHD**

**(Separate numbering of references)**

**Acute GVHD.** Most clinical studies of ECP and of the pharmacological alternatives for second-line treatment are nonrandomized; many of these studies are relatively small and for each therapeutic alternative only a few studies are usually available (Supplementary Table) [1-38]. The survival data from representative ECP studies are compared in the table; one of these studies was a summary of previous Italian studies [7] and one was only a brief Letter to the Editor [8]; for these reasons they were not suitable for the more detailed presentation given in Table 1 of the article. Survival data for 9 ECP studies were suitable for this comparison; the 9 studies included a total of 257 patients, most of them are retrospective and both the response rates as well as the survival show a wide variation. Anti-thymocyte globulin is a therapeutic alternative that has been investigated in 5 studies [10-14]; 233 patients have been included and the response and survival rates are comparable to ECP but with less variation. The same is true for IL2 targeting therapy [15-18]; 135 patients have been included in 4 studies of either IL2 or IL2 receptor (CD25) targeting therapy. The experience with the other pharmacological alternatives is even less. It is not surprising that the available guidelines differ in their recommendations.

It can be seen from the Supplementary Table that the efficiency of mesenchymal stem cell therapy is comparable to alternative therapeutic strategies for the treatment of steroid-resistant acute GVHD [19-24]. The clinical studies of this therapeutic approach have included a relatively large number of

patients, the complete response rate is relatively high in several studies, the acute toxicity seems minimal and the general long-term immunosuppression is weak with low non-relapse mortality for responder patients. However, one study suggested that MSC treatment for acute GVHD can be associated with increased risk of late infections [39], but this was a small study and the observation has to be confirmed in additional studies (preferably randomized studies) before a final conclusion can be reached.

All the studies summarized in Table 1 emphasize the importance that both treatment efficiency and toxicity has to be carefully evaluated when comparing various therapeutic alternatives, and patients receiving long-term treatment for steroid-resistant GVHD have relatively high non-relapse mortality because these patients are severely immunocompromized. In this context ECP seems to have an advantage with a relatively low/absent general immunosuppressive effect. Three available guidelines are summarized below.

*The British Society for Bone Marrow Transplantation.* [41]. These guidelines emphasize the excellent safety profile of ECP. However, even though side effects appear to be mild and there are no reports of increased frequencies of infections or relapse, the authors conclude that the first line treatment should be steroids whereas ECP as well as anti-TNF $\alpha$  antibodies, mTOR inhibitors, mycophenolate mofetil and interleukin 2 receptor antibodies should only be used as second line treatment. The available knowledge does not allow any of these strategies to be preferred.

*The American Society of Blood and Marrow Transplantation* [42]. These guidelines distinguish between second line and further treatment, and they conclude that there is at present no support for the choice of any specific agent for second-line treatment of acute GVHD based on 6 months survival data, complete response rates or overall response rates. These guidelines also emphasize the limited toxicity, lack of significant interactions and no risk of viral reactivation as important advantages of ECP. These authors especially review and point to the advantage of low toxicity by ECP. The most important disadvantage is traveling to an ECP center, and similar to several other alternatives ECP is very expensive.

*The Italian Group for Bone Marrow Transplantation* [43]. This group also concludes that there is currently no evidence to suggest that ECP is superior to other second-line alternatives.

**Chronic GVHD.** The guidelines from the British Society for Bone Marrow Transplantation recommend steroids as the first-line treatment eventually in combination with a calcineurin inhibitor, and as a possible second line treatment they recommend ECP for skin, oral and liver GVHD [44]. Alternative second line options are rapamycin, pentostatin, rituximab (cutaneous and musculoskeletal chronic GVHD) and imatinib (pulmonary and sclerodermatous chronic GVHD). ECP, imatinib and rituximab are regarded as third line treatment when other organs are affected. A wide range of agents have been tried in small clinical studies, but mycophenolate mofetil, metotrexate and pulsed corticosteroids were the only additional third line therapies that were recommended. Inamoto and Flowers [45] recommended ECP as a second line treatment together with rituximab, imatinib, pentostatin, mesenchymal stem cells, mycophenolate mofetil and mTOR inhibitors. Both these reviews as well as the Italian Group for Bone Marrow Transplantation [43] concluded that it is not possible to recommend one specific strategy as the preferred second line treatment.

Supplementary table. A summary of representative clinical studies investigating the effects of various therapeutic alternatives in acute GVHD (numbering of references is the same as in the printed article).

| REFS.                                                                                                      | PATIENT NUMBER | TYPE OF STUDY | COMPLETE RESPONSE RATE | COMPLETE + PARTIAL RESPONSE RATE | SURVIVAL  | TIME FOR SURVIVAL EVALUTAION                            |
|------------------------------------------------------------------------------------------------------------|----------------|---------------|------------------------|----------------------------------|-----------|---------------------------------------------------------|
| <b>EXTRACORPOREAL PHOTOPHERESIS - IMMUNOMODULATION - 257 PATIENTS INCLUDED IN 10 RETROSPECTIVE STUDIES</b> |                |               |                        |                                  |           |                                                         |
| [1]                                                                                                        | 59             | Prospective   |                        |                                  | 0.47      | Estimated 4 years survival                              |
| [2]                                                                                                        | 50             | Retro         |                        | 0.68                             | 0.44      | Median time to follow-up 14 months, range 2-102 months  |
| [3]                                                                                                        | 41             | Retro         |                        | 0.73                             |           |                                                         |
| [4]                                                                                                        | 33             | Prospective   | 0.54                   | 0.21                             | 0.69/0.12 | Estimated 5 years survival for responders/nonresponders |
| [5]                                                                                                        | 23             | Retro         | 0.52                   |                                  | 0.48      | Median survival after 37 months                         |
| [6]                                                                                                        | 15             | Retro         | 0.73                   | 1.0                              | 0.85      | 2-years overall survival                                |
| [7]                                                                                                        | 12             | Retro         | 0.59                   | 0.83                             | 0.67      | Median observation time 16 months (range 1-56 months)   |
| [8]                                                                                                        | 12             | Retro         | 0.50                   | 0.33                             | 0.57      | 5 years overall survival                                |
| [9]                                                                                                        | 12             | Retro         |                        | 0.75                             |           |                                                         |
| <b>ANTITHYMOCYTE GLOBULIN - T CELL DEPLETION - 233 PATIENTS INCLUDED IN 5 STUDIES (3 RETROSPECTIVE)</b>    |                |               |                        |                                  |           |                                                         |
| [10]                                                                                                       | 79             | Retro         | 0.20                   | 0.54                             | 0.44      | 6 months                                                |
| [11]                                                                                                       | 58             | Retro         | 0.07                   | 0.28                             |           | 6 months                                                |
| [12]                                                                                                       | 47             | Phase II      | 0.32                   | 0.57                             | 0.45      | 6 months                                                |
| [13]                                                                                                       | 27             | Phase II/III  | 0.33                   | 0.56                             | 0.55      | 6 months                                                |
| [14]                                                                                                       | 22             | Retro         |                        | 0.18                             | 0.61      | 6 months                                                |
| <b>BASILIXIMAB - chimeric IL2 receptor antagonist - ONE PHASE 2 STUDY INCLUDING 23 PATIENTS</b>            |                |               |                        |                                  |           |                                                         |
| [15]                                                                                                       | 23             | Phase II      | 0.17                   | 0.83                             | 0.55      | 6 months                                                |
| <b>DACLIZIMAB - anti-CD25 - 3 STUDIES INCLUDING 112 PATIENTS (1 RETROSPECTIVE)</b>                         |                |               |                        |                                  |           |                                                         |
| [16]                                                                                                       | 57             | Retro         | 0.33                   | 0.54                             | 0.28      | 6 months                                                |
| [17]                                                                                                       | 43             | Phase II      | 0.37                   | 0.51                             |           | 6 months                                                |
| [18]                                                                                                       | 12             | Phase II      | 0.08                   | 0.50                             | 0.33      | 6 months                                                |

**MESENCHYMAN STEM CELLS - IMMUNOMODULATION - 7 STUDIES INCLUDING 164 PATIENTS**

|      |    |            |      |      |      |                                                                            |
|------|----|------------|------|------|------|----------------------------------------------------------------------------|
| [19] | 55 | Phase II   | 0.57 | 0.75 |      | Overall survival at 2 years 0.53 for responders and 0.16 for nonresponders |
| [20] | 32 | Phase II   | 0.77 | 0.16 |      | Overall survival after 30 months                                           |
|      | 12 | Phase I/II | 0.57 | 0.33 | 0.55 |                                                                            |
| [21] | 10 | Phase I/II | 0.10 | 0.60 |      |                                                                            |
| [22] | 8  | Phase I/II | 0.60 | -    |      |                                                                            |
| [23] | 37 | Retro      | 0.65 | 0.87 | 0.37 | Median followup 2.9 years                                                  |
| [24] | 12 | Phase I/II | 0.58 | 0.75 | 0.41 | Median followup 611 days                                                   |

**PENTOSTATIN - IMMUNOMODULATION - 4 STUDIES (3 RETROSPECTIVE) INCLUDING 109 PATIENTS**

|      |    |          |      |      |           |                                            |
|------|----|----------|------|------|-----------|--------------------------------------------|
| [25] | 15 | Retro    | 0.13 | 0.33 |           |                                            |
| [26] | 12 | Retro    | 0.33 | 0.50 |           | Median overall survival at 5 months        |
| [27] | 24 | Retro    |      | 0.36 | 0.17      | Followup at 2 years                        |
| [28] | 58 | Phase II |      | 0.64 | 0.78/0.70 | Overall survival evaluated after 1/2 years |

**MYCOPHENOLATE MOFETIL - IMMUNOSUPPRESSION - 4 RETROSPECTIVE STUDIES INCLUDING 98 PATIENTS**

|      |    |       |      |      |      |          |
|------|----|-------|------|------|------|----------|
| [29] | 48 | Retro | 0.31 | 0.79 | 0.47 | 6 months |
| [30] | 27 | Retro | 0.26 |      | 0.52 | 6 months |
| [31] | 13 | Retro | 0.15 | 0.46 | 0.66 | 6 months |
| [32] | 10 | Retro | 0    | 0.60 | 0.77 | 6 months |

**DENILEUKINDIFTIOX - toxin-coupled anti-CD25 antibody - 2 PROSPECTIVE STUDIES INCLUDING 54 PATIENTS**

|      |    |          |      |      |  |          |
|------|----|----------|------|------|--|----------|
| [33] | 32 | Phase I  | 0.38 | 0.53 |  | 6 months |
| [34] | 22 | Phase II | 0.18 | 0.27 |  | 6 months |

**SIROLIMUS - mTOR inhibitor - ONE RETROSPECTIVE STUDY INCLUDING 34 PATIENTS**

|      |    |       |     |      |      |          |
|------|----|-------|-----|------|------|----------|
| [35] | 34 | Retro | 0.4 | 0.76 | 0.48 | 6 months |
|------|----|-------|-----|------|------|----------|

**INFLIXIMAB - anti-TNF $\alpha$  antibody - ONE RETROSPECTIVE STUDY INCLUDING 21 PATIENTS**

|      |    |       |      |      |      |          |
|------|----|-------|------|------|------|----------|
| [36] | 21 | Retro | 0.62 | 0.67 | 0.52 | 6 months |
|------|----|-------|------|------|------|----------|

---

**ETANERCEPT - soluble dimeric TNF $\alpha$  receptor 2 - ONE STUDY INCLUDING 13 PATIENTS**

---

[37] 13 Retro 0.38 0.46 0.77 6 months

---

**METHOTREXATE - IMMUNOSUPPRESSION -ONE RETROSPECTIVE STUDY INCLUDING 12 PATIENTS**

---

[38] 12 Retro 0.42 0.58 0.58 6 months

---

## REFERENCES

1. Greinix HT, Knobler RM, Worel N, Schneider B, Schneeberger A, Hoecker P, Mitterbauer M, Rabitsch W, Schulenburg A, Kalhs P (2006) The effect of intensified extracorporeal photochemotherapy on long-term survival in patients with severe acute graft-versus-host disease. *Haematologica* 91 (3):405-408
2. Perotti C, Del Fante C, Tinelli C, Viarengo G, Scudeller L, Zecca M, Locatelli F, Salvaneschi L (2010) Extracorporeal photochemotherapy in graft-versus-host disease: a longitudinal study on factors influencing the response and survival in pediatric patients. *Transfusion* 50 (6):1359-1369. doi:10.1111/j.1537-2995.2009.02577.x
3. Kanold J, Messina C, Halle P, Locatelli F, Lanino E, Cesaro S, Demeocq F, Paediatric Diseases Working Party of the European Group for B, Marrow T (2005) Update on extracorporeal photochemotherapy for graft-versus-host disease treatment. *Bone Marrow Transplant* 35 Suppl 1:S69-71. doi:10.1038/sj.bmt.1704851
4. Messina C, Locatelli F, Lanino E, Uderzo C, Zacchello G, Cesaro S, Pillon M, Perotti C, Del Fante C, Faraci M, Rivabella L, Calore E, De Stefano P, Zecca M, Giorgiani G, Brugiolo A, Balduzzi A, Dini G, Zanesco L, Dall'Amico R (2003) Extracorporeal photochemotherapy for paediatric patients with graft-versus-host disease after haematopoietic stem cell transplantation. *Br J Haematol* 122 (1):118-127
5. Perfetti P, Carlier P, Strada P, Gualandi F, Occhini D, Van Lint MT, Ibatci A, Lamparelli T, Bruno B, Raiola AM, Dominietto A, Di Grazia C, Bregante S, Zia S, Ferrari GM, Stura P, Pogliani E, Bacigalupo A (2008) Extracorporeal photopheresis for the treatment of steroid refractory acute GVHD. *Bone Marrow Transplant* 42 (9):609-617. doi:10.1038/bmt.2008.221
6. Calore E, Calo A, Tridello G, Cesaro S, Pillon M, Varotto S, Gazzola MV, Destro R, Marson P, Trentin L, Carli M, Messina C (2008) Extracorporeal photochemotherapy may improve outcome in children with acute GVHD. *Bone Marrow Transplant* 42 (6):421-425. doi:10.1038/bmt.2008.174

7. Kanold J, Merlin E, Halle P, Paillard C, Marabelle A, Rapatel C, Evrard B, Berger C, Stephan JL, Galambrun C, Piguet C, D'Incan M, Bordigoni P, Demeocq F (2007) Photopheresis in pediatric graft-versus-host disease after allogeneic marrow transplantation: clinical practice guidelines based on field experience and review of the literature. *Transfusion* 47 (12):2276-2289. doi:10.1111/j.1537-2995.2007.01469.x
8. Merlin E, Paillard C, Rochette E, David A, Isfan F, Dore E, Demeocq F, Kanold J (2010) Extracorporeal photochemotherapy as second- or first-line therapy of acute GVHD? *Bone Marrow Transplant* 45 (5):963-965. doi:10.1038/bmt.2009.271
9. Garban F, Drillat P, Makowski C, Jacob MC, Richard MJ, Favrot M, Sotto JJ, Bensa JC, Cahn JY (2005) Extracorporeal chemophototherapy for the treatment of graft-versus-host disease: hematologic consequences of short-term, intensive courses. *Haematologica* 90 (8):1096-1101
10. MacMillan ML, Weisdorf DJ, Davies SM, DeFor TE, Burns LJ, Ramsay NK, Wagner JE, Blazar BR (2002) Early antithymocyte globulin therapy improves survival in patients with steroid-resistant acute graft-versus-host disease. *Biol Blood Marrow Transplant* 8 (1):40-46
11. Khoury H, Kashyap A, Adkins DR, Brown RA, Miller G, Vij R, Westervelt P, Trinkaus K, Goodnough LT, Hayashi RJ, Parker P, Forman SJ, DiPersio JF (2001) Treatment of steroid-resistant acute graft-versus-host disease with anti-thymocyte globulin. *Bone Marrow Transplant* 27 (10):1059-1064. doi:10.1038/sj.bmt.1703032
12. Macmillan ML, Couriel D, Weisdorf DJ, Schwab G, Havrilla N, Fleming TR, Huang S, Roskos L, Slavin S, Shaddock RK, Dipersio J, Territo M, Pavletic S, Linker C, Heslop HE, Deeg HJ, Blazar BR (2007) A phase 2/3 multicenter randomized clinical trial of ABX-CBL versus ATG as secondary therapy for steroid-resistant acute graft-versus-host disease. *Blood* 109 (6):2657-2662. doi:10.1182/blood-2006-08-013995
13. Van Lint MT, Milone G, Leotta S, Uderzo C, Scime R, Dallorso S, Locasciulli A, Guidi S, Mordini N, Sica S, Cudillo L, Fagioli F, Selleri C, Bruno B, Arcese W, Bacigalupo A (2006) Treatment of acute graft-versus-host disease with prednisolone: significant survival advantage for day +5 responders and no advantage for nonresponders receiving anti-thymocyte globulin. *Blood* 107 (10):4177-4181. doi:10.1182/blood-2005-12-4851

14. Roy J, McGlave PB, Filipovich AH, Miller WJ, Blazar BR, Ramsay NK, Kersey JH, Weisdorf DJ (1992) Acute graft-versus-host disease following unrelated donor marrow transplantation: failure of conventional therapy. *Bone Marrow Transplant* 10 (1):77-82
15. Schmidt-Hieber M, Fietz T, Knauf W, Uharek L, Hopfenmuller W, Thiel E, Blau IW (2005) Efficacy of the interleukin-2 receptor antagonist basiliximab in steroid-refractory acute graft-versus-host disease. *Br J Haematol* 130 (4):568-574. doi:10.1111/j.1365-2141.2005.05631.x
16. Perales MA, Ishill N, Lomazow WA, Weinstock DM, Papadopoulos EB, Dastagir H, Chiu M, Boulad F, Castro-Malaspina HR, Heller G, Jakubowski AA, O'Reilly RJ, Small TN, Young JW, Kernan NA (2007) Long-term follow-up of patients treated with daclizumab for steroid-refractory acute graft-vs-host disease. *Bone Marrow Transplant* 40 (5):481-486. doi:10.1038/sj.bmt.1705762
17. Przepiorka D, Kernan NA, Ippoliti C, Papadopoulos EB, Giralt S, Khouri I, Lu JG, Gajewski J, Durett A, Cleary K, Champlin R, Andersson BS, Light S (2000) Daclizumab, a humanized anti-interleukin-2 receptor alpha chain antibody, for treatment of acute graft-versus-host disease. *Blood* 95 (1):83-89
18. Willenbacher W, Basara N, Blau IW, Fauser AA, Kiehl MG (2001) Treatment of steroid refractory acute and chronic graft-versus-host disease with daclizumab. *Br J Haematol* 112 (3):820-823
19. Le Blanc K, Frassoni F, Ball L, Locatelli F, Roelofs H, Lewis I, Lanino E, Sundberg B, Bernardo ME, Remberger M, Dini G, Egeler RM, Bacigalupo A, Fibbe W, Ringden O (2008) Mesenchymal stem cells for treatment of steroid-resistant, severe, acute graft-versus-host disease: a phase II study. *Lancet* 371 (9624):1579-1586. doi:10.1016/S0140-6736(08)60690-X
20. Kebriaei P, Isola L, Bahceci E, Holland K, Rowley S, McGuirk J, Devetten M, Jansen J, Herzig R, Schuster M, Monroy R, Uberti J (2009) Adult human mesenchymal stem cells added to corticosteroid therapy for the treatment of acute graft-versus-host disease. *Biol Blood Marrow Transplant* 15 (7):804-811. doi:10.1016/j.bbmt.2008.03.012
21. Herrmann R, Sturm M, Shaw K, Purtill D, Cooney J, Wright M, Phillips M, Cannell P (2012) Mesenchymal stromal cell therapy for steroid-refractory acute and chronic graft versus host disease: a phase 1 study. *Int J Hematol* 95 (2):182-188. doi:10.1007/s12185-011-0989-2

22. Ringden O, Uzunel M, Rasmusson I, Remberger M, Sundberg B, Lonnie H, Marschall HU, Dlugosz A, Szakos A, Hassan Z, Omazic B, Aschan J, Barkholt L, Le Blanc K (2006) Mesenchymal stem cells for treatment of therapy-resistant graft-versus-host disease. *Transplantation* 81 (10):1390-1397. doi:10.1097/01.tp.0000214462.63943.14
23. Ball LM, Bernardo ME, Roelofs H, van Tol MJ, Contoli B, Zwaginga JJ, Avanzini MA, Conforti A, Bertaina A, Giorgiani G, Jol-van der Zijde CM, Zecca M, Le Blanc K, Frassoni F, Egeler RM, Fibbe WE, Lankester AC, Locatelli F (2013) Multiple infusions of mesenchymal stromal cells induce sustained remission in children with steroid-refractory, grade III-IV acute graft-versus-host disease. *Br J Haematol* 163 (4):501-509. doi:10.1111/bjh.12545
24. Prasad VK, Lucas KG, Kleiner GI, Talano JA, Jacobsohn D, Broadwater G, Monroy R, Kurtzberg J (2011) Efficacy and safety of ex vivo cultured adult human mesenchymal stem cells (Prochymal) in pediatric patients with severe refractory acute graft-versus-host disease in a compassionate use study. *Biol Blood Marrow Transplant* 17 (4):534-541. doi:10.1016/j.bbmt.2010.04.014
25. Alam N, Atenafu EG, Tse G, Viswabandya A, Gupta V, Kim D, Lipton JH, Messner HA, Kuruvilla J (2013) Limited benefit of pentostatin salvage therapy for steroid-refractory grade III-IV acute graft-versus-host disease. *Clin Transplant* 27 (6):930-937. doi:10.1111/ctr.12268
26. Klein SA, Bug G, Mousset S, Hofmann WK, Hoelzer D, Martin H (2011) Long term outcome of patients with steroid-refractory acute intestinal graft versus host disease after treatment with pentostatin. *Br J Haematol* 154 (1):143-146. doi:10.1111/j.1365-2141.2010.08495.x
27. Schmitt T, Luft T, Hegenbart U, Tran TH, Ho AD, Dreger P (2011) Pentostatin for treatment of steroid-refractory acute GVHD: a retrospective single-center analysis. *Bone Marrow Transplant* 46 (4):580-585. doi:10.1038/bmt.2010.146
28. Jacobsohn DA, Chen AR, Zahurak M, Piantadosi S, Anders V, Bolanos-Meade J, Higman M, Margolis J, Kaup M, Vogelsang GB (2007) Phase II study of pentostatin in patients with corticosteroid-refractory chronic graft-versus-host disease. *J Clin Oncol* 25 (27):4255-4261. doi:10.1200/JCO.2007.10.8456
29. Furlong T, Martin P, Flowers ME, Carnevale-Schianca F, Yatscoff R, Chauncey T, Appelbaum FR, Deeg HJ, Doney K, Witherspoon R, Storer B, Sullivan KM, Storb R, Nash RA (2009)

- Therapy with mycophenolate mofetil for refractory acute and chronic GVHD. *Bone Marrow Transplant* 44 (11):739-748. doi:10.1038/bmt.2009.76
30. Pidala J, Kim J, Perkins J, Field T, Fernandez H, Perez L, Ayala E, Kharfan-Dabaja M, Anasetti C (2010) Mycophenolate mofetil for the management of steroid-refractory acute graft vs host disease. *Bone Marrow Transplant* 45 (5):919-924. doi:10.1038/bmt.2009.252
  31. Kim JG, Sohn SK, Kim DH, Lee NY, Suh JS, Lee KS, Lee KB (2004) Different efficacy of mycophenolate mofetil as salvage treatment for acute and chronic GVHD after allogeneic stem cell transplant. *Eur J Haematol* 73 (1):56-61. doi:10.1111/j.1600-0609.2004.00247.x
  32. Krejci M, Doubek M, Buchler T, Brychtova Y, Vorlicek J, Mayer J (2005) Mycophenolate mofetil for the treatment of acute and chronic steroid-refractory graft-versus-host disease. *Ann Hematol* 84 (10):681-685. doi:10.1007/s00277-005-1070-0
  33. Ho VT, Zahrieh D, Hochberg E, Micale E, Levin J, Reynolds C, Steckel S, Cutler C, Fisher DC, Lee SJ, Alyea EP, Ritz J, Soiffer RJ, Antin JH (2004) Safety and efficacy of denileukin diftitox in patients with steroid-refractory acute graft-versus-host disease after allogeneic hematopoietic stem cell transplantation. *Blood* 104 (4):1224-1226. doi:10.1182/blood-2004-01-0028
  34. Shaughnessy PJ, Bachier C, Grimley M, Freytes CO, Callander NS, Essell JH, Flomenberg N, Selby G, Lemaistre CF (2005) Denileukin diftitox for the treatment of steroid-resistant acute graft-versus-host disease. *Biol Blood Marrow Transplant* 11 (3):188-193. doi:10.1016/j.bbmt.2004.11.022
  35. Hoda D, Pidala J, Salgado-Vila N, Kim J, Perkins J, Bookout R, Field T, Perez L, Ayala E, Ochoa-Bayona JL, Raychaudhuri J, Alsina M, Greene J, Janssen W, Fernandez HF, Anasetti C, Kharfan-Dabaja MA (2010) Sirolimus for treatment of steroid-refractory acute graft-versus-host disease. *Bone Marrow Transplant* 45 (8):1347-1351. doi:10.1038/bmt.2009.343
  36. Couriel DR, Saliba R, de Lima M, Giralt S, Andersson B, Khouri I, Hosing C, Ippoliti C, Shpall EJ, Champlin R, Alousi A (2009) A phase III study of infliximab and corticosteroids for the initial treatment of acute graft-versus-host disease. *Biol Blood Marrow Transplant* 15 (12):1555-1562. doi:10.1016/j.bbmt.2009.08.003

37. Busca A, Locatelli F, Marmont F, Ceretto C, Falda M (2007) Recombinant human soluble tumor necrosis factor receptor fusion protein as treatment for steroid refractory graft-versus-host disease following allogeneic hematopoietic stem cell transplantation. *Am J Hematol* 82 (1):45-52. doi:10.1002/ajh.20752
38. de Lavallade H, Mohty M, Faucher C, Furst S, El-Cheikh J, Blaise D (2006) Low-dose methotrexate as salvage therapy for refractory graft-versus-host disease after reduced-intensity conditioning allogeneic stem cell transplantation. *Haematologica* 91 (10):1438-1440
39. von Bahr L, Sundberg B, Lonnie L, Sander B, Karbach H, Hagglund H, Ljungman P, Gustafsson B, Karlsson H, Le Blanc K, Ringden O (2012) Long-term complications, immunologic effects, and role of passage for outcome in mesenchymal stromal cell therapy. *Biol Blood Marrow Transplant* 18 (4):557-564. doi:10.1016/j.bbmt.2011.07.023
40. Alousi AM, Weisdorf DJ, Logan BR, Bolanos-Meade J, Carter S, Difronzo N, Pasquini M, Goldstein SC, Ho VT, Hayes-Lattin B, Wingard JR, Horowitz MM, Levine JE, Blood, Marrow Transplant Clinical Trials N (2009) Etanercept, mycophenolate, denileukin, or pentostatin plus corticosteroids for acute graft-versus-host disease: a randomized phase 2 trial from the Blood and Marrow Transplant Clinical Trials Network. *Blood* 114 (3):511-517. doi:10.1182/blood-2009-03-212290
41. Dignan FL, Clark A, Amrolia P, Cornish J, Jackson G, Mahendra P, Scarisbrick JJ, Taylor PC, Hadzic N, Shaw BE, Potter MN, Haemato-oncology Task Force of British Committee for Standards in H, British Society for B, Marrow T (2012) Diagnosis and management of acute graft-versus-host disease. *Br J Haematol* 158 (1):30-45. doi:10.1111/j.1365-2141.2012.09129.x
42. Martin PJ, Rizzo JD, Wingard JR, Ballen K, Curtin PT, Cutler C, Litzow MR, Nieto Y, Savani BN, Schriber JR, Shaughnessy PJ, Wall DA, Carpenter PA (2012) First- and second-line systemic treatment of acute graft-versus-host disease: recommendations of the American Society of Blood and Marrow Transplantation. *Biol Blood Marrow Transplant* 18 (8):1150-1163. doi:10.1016/j.bbmt.2012.04.005
43. Pierelli L, Perseghin P, Marchetti M, Messina C, Perotti C, Mazzoni A, Bacigalupo A, Locatelli F, Carlier P, Bosi A, Societa Italiana di Emaferesi and Manipolazione Cellulare (SIdEM); Gruppo

Italiano Trapianto Midollo Osseo (GITMO) (2013) Extracorporeal photopheresis for the treatment of acute and chronic graft-versus-host disease in adults and children: best practice recommendations from an Italian Society of Hemapheresis and Cell Manipulation (SIdEM) and Italian Group for Bone Marrow Transplantation (GITMO) consensus process. *Transfusion* 53(10):2340-52.

44. Dignan FL, Amrolia P, Clark A, Cornish J, Jackson G, Mahendra P, Scarisbrick JJ, Taylor PC, Shaw BE, Potter MN, Haemato-oncology Task Force of British Committee for Standards in H, British Society for B, Marrow T (2012) Diagnosis and management of chronic graft-versus-host disease. *Br J Haematol* 158 (1):46-61. doi:10.1111/j.1365-2141.2012.09128.x
45. Inamoto Y, Flowers ME (2011) Treatment of chronic graft-versus-host disease in 2011. *Curr Opin Hematol* 18 (6):414-420. doi:10.1097/MOH.0b013e32834ba87d
